# Supplementary material
Source: PubMed Central journal article supplement (PMC7398672)
Supplement: mmc1.pdf [file mmc1.pdf]

# THE LANCET

## Global Health

### Supplementary appendix

This appendix formed part of the original submission and has been peer reviewed.  
We post it as supplied by the authors.

Supplement to: Busch-Hallen J, Walters D, Rowe S, Chowdhury A, Arabi M. Impact of COVID-19 on maternal and child health. *Lancet Glob Health* 2020; published online Aug 1. [http://dx.doi.org/10.1016/S2214-109X\(20\)30327-2](http://dx.doi.org/10.1016/S2214-109X(20)30327-2).

Table 1. Estimated number of deaths of children year attributable to reductions in breastfeeding prevalence by region and country income group during the Covid-19 pandemic. Child deaths are due to pneumonia and diarrhea .

|                                       | <b>Scenario 1</b>                      | <b>Scenario 2</b>                       | <b>Scenario 3</b>                       | <b>Scenario 4</b>                       |
|---------------------------------------|----------------------------------------|-----------------------------------------|-----------------------------------------|-----------------------------------------|
|                                       | 5% Relative Reduction in BF Prevalence | 10% Relative Reduction in BF Prevalence | 25% Relative Reduction in BF Prevalence | 50% Relative Reduction in BF Prevalence |
| <b>Regions</b>                        | <b>Total child deaths</b>              |                                         |                                         |                                         |
| <b>East Asia &amp; Pacific</b>        | 970                                    | 1,798                                   | 4,112                                   | 7,488                                   |
| <b>Europe &amp; Central Asia</b>      | 87                                     | 171                                     | 413                                     | 1,719                                   |
| <b>Middle East &amp; North Africa</b> | 223                                    | 440                                     | 1,059                                   | 1,995                                   |
| <b>Latin America &amp; Caribbean</b>  | 194                                    | 383                                     | 917                                     | 1,719                                   |
| <b>South Asia</b>                     | 7,035                                  | 13,750                                  | 32,187                                  | 58,226                                  |
| <b>Sub-Saharan Africa</b>             | 7,960                                  | 15,596                                  | 36,766                                  | 67,252                                  |
| <b>Total</b>                          | <b>16,469</b>                          | <b>32,139</b>                           | <b>75,455</b>                           | <b>138,398</b>                          |
